# Supplementary material for: Exceptional enhancement of Raman scattering on silver chlorobromide nanocube photonic crystals: chemical and photonic contributions
Source: Royal Society of Chemistry journal article supplement (doi:10.1039/c5tc00077g), 2015-01-01
Supplement: c5tc00077g1.pdf [file c5tc00077g1.pdf]

## **Supporting Information**

# Exceptional Enhancement of Raman Scattering on Silver Chlorobromide Nanocube Photonic Crystals: Chemical and Photonic Contributions

*Zheng Li, David J. Gosztola, Cheng-Jun Sun, Steve M. Heald, Yugang Sun\**

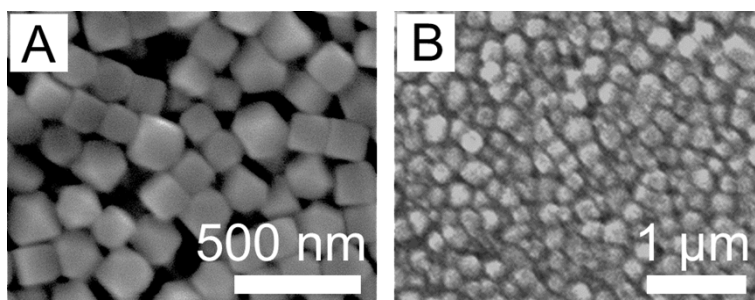

**Figure S1.** SEM images of (A) Ag nanocubes precipitated at the bottom of a centrifuge tube after centrifugation and (B) randomly organized AgCl<sub>0.44</sub>Br<sub>0.56</sub> nanocubes on a glass slide after a drop of dispersion was dried at room temperature.

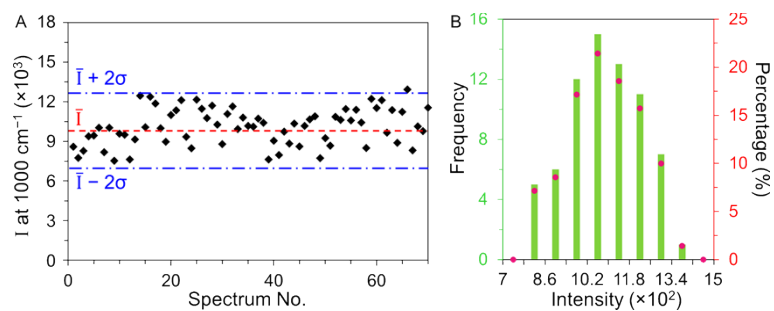

**Figure S2.** Statistical analysis of the Raman intensity at 999 cm<sup>-1</sup> measured from thiophenol molecules adsorbed on the AgCl<sub>0.44</sub>Br<sub>0.56</sub> nanocube photonic crystal at 70 random spots. The red dashed line in (A) highlights the average intensity ( $\bar{I}$ ) and the blue dash dotted lines highlight the average plus/minus two times of the standard deviation ( $\bar{I} \pm 2\sigma$ ).
